# Supplementary material for: Assessment of GNSS radio occultation refractivity under heavyprecipitation
Source: Copernicus journal article supplement (doi:10.5194/acp-2018-66), 2018-03-08
Supplement: Supplementary file [file acp-2018-66-AC1-supplement.pdf]

Reviewer #1:

The authors would like to thank the reviewers for spending time and effort reviewing this manuscript. Their comments are deeply appreciated and have resulted in an improved version of the manuscript. Below we address point by point all the comments and recommendations of the reviewers, and at the end of the document there is the new version of the paper with the changes highlighted in blue.

### Summary:

This paper assess the impact of heavy precipitation on GPS radio occultation measurements through comparison of RO profiles within the precipitation and without precipitation as indicated by the satellite radar observations. Systematic positive refractivity errors (or N-biases) above ~2.5 km are shown in GPS RO soundings in the presence of precipitation, when comparing to two analyses (ECMWF, GFS) and one reanalysis (ERA-I). The results is consistent with multiple previous studies by Lin et al. (2010), Yang and Zou (2012), Xou et al., (2012) and Yang and Zou (2016). However, these previous studies attribute such positive N-bias to the GPS RO sounding retrievals for neglecting the RO refractivity contribution from liquid and ice water contents. In contrast, this paper attributes the N-biases to the possible deficiency in global analyses/reanalysis under high specific humidity condition (including both rain and no-rain). The simulation studies were carried out to investigate the contribution of the liquid/ice water content by ray tracing through a 3-D atmosphere with realistic liquid/ice water content estimated from TRMM. The particle size distribution  $N(D)$  are adapted from the one used in TRMM radar precipitation retrieval. The simulation study of 65 cases confirms that the liquid/ice water content do not introduce significant bias to the RO retrieval. Further analysis of the N-bias with respect to the specific humidity shows good correlation with the high specific humidity instead of the precipitation.

Overall, the paper is well written. The science of the paper is significant and it advances our understanding of the liquid/ice water content on the GPS RO measurements, which has puzzled the RO community for quite some time. The discovery of positive N-bias (i.e., negative temperature bias, and/or positive moisture bias) likely attributed to the global analyses/reanalysis in the high specific humidity condition will be worth further investigation. Note some more details related to the simulation of liquid/ice water content are needed in the manuscript, and some text and a few figures can be improved.

I would recommend publication of the paper after “minor revision”. The comments are listed below:

### Major comments:

1. Section 4 missed some details of the ray-tracing simulation.
  - a. The typical range of the liquid and ice water content (along the ray path) derived from TRMM radar reflection measurement (e.g., at different altitude in Fig. 1) should be shown or at least discussed in the manuscript.
  - b. The size distribution of the particles,  $N(D)$  was not shown.

- c. How typical are those precipitation cases observed by TRMM? For example, the size, rain rate, etc, should be discussed.

We have included some typical values about the ray tracing simulation. We provide an order of magnitude of the length of the rays below 15 km and the typical water content paths in the end of Sec 4, and we provide some typical numbers of the 65 TRMM cases in Sec 4.1 for representativeness.

2. The N-bias study (e.g., Fig. 6) focused on the high specific humidity based on COSMIC RO wet retrieval. Could the authors use the analyses/reanalysis specific humidity instead, and see whether the N-bias pattern will remain the same? Or is there any references that compare the RO specific humidity with the global analyses/reanalyses, which confirm the consistency?

One direct consequence of the positive difference between the RO and the analyses refractivity is that the specific humidity difference between RO and analyses is also positive. When the refractivity difference is negative, the specific humidity difference is also negative. The relationship between refractivity difference and specific humidity difference between RO and analyses has been checked, and the correlation is high.

Since the positive bias is larger as  $q_{RO}$  increases (e.g. Fig 5), most points in high regions of  $q_{RO}$  will correspond to points not so high in the  $q_{An}$  (analyses). Most points in the lower values of  $q_{RO}$  would correspond to more similar values of  $q_{An}$ , because the overall bias is smaller. Therefore, the values that contribute the most to the positive bias will be diluted with much more values with less N-difference, reducing the overall bias as a function of  $q_{An}$ . We have checked this relationship, and we observe how the relationship of the bias with  $q_{An}$  is less obvious, specially in the no-rain cases. For the rain cases, the fact that there is an overpopulation in the high region of  $q_{RO}$  (due to the contribution of the tropical precipitation) with respect to the medium values of  $q$  makes the refractivity bias as a function of  $q_{An}$  less different than when it is plotted as a function  $q_{RO}$ , with the most obvious difference being that the maximum refractivity difference is reached at lower  $q_{An}$  values.

In consequence, when we repeat Figure 6 using the  $q_{An}$  values the no rain and high specific humidity becomes less populated, and the bias is reduced being significant only for the ERA case. On the other hand, the overall bias in the rain and low specific humidity becomes stronger. The cases with no rain and low specific humidity and rain with high specific humidity keep the main characteristics shown in the  $q_{RO}$  case.

We do not include this discussion in the paper, since we understand that can be explained as a direct consequence of the fact that positive refractivity bias is linked to positive specific humidity differences, which is stated in the discussion. However, we include a citation to Vergados, et al. 2015, which shows that ERA-interim is systematically drier than RO in the tropics in agreement with our reasoning.

3. Figure 3:
  - a. Add latitude/longitude labels
  - b. Add the title for each row with the precipitation rate “<R>”
  - c. Maybe put side labels for “ERA-I, ECMWF\_An, GFS”

Corrected

4. Figure 4:
  - a. Why the impact height goes all the way down to 0 km, which will likely be ~2km below the earth surface. Should that be “geometric height” instead, especially for the refractivity error plot? Please verify and make sure it is consistent with the manuscript description in L3 in Section 4.1.

It was a mistake. Now the bending angle is shown as a function of the impact height, and refractivity as a function of the geometric height.

5. Figure 6:
  - a. Add latitude/longitude labels
  - b. Add labels after each column title: “no rain low q (<0.5 g/kg)” etc.
  - c. Maybe put side labels for “ERA-I, ECMWF\_An, GFS”

Corrected

#### Technical comments:

The line numbers were messy and not consistent. The following is the best I can do to point to the text in the manuscript.

“liquid and solid water content” -> liquid and ice water content

Corrected

Page-1 – Sec. 1 (right column)

L20: remove “of the”

Removed

Page-3 – Sec.2.1

L01: change to “the global surface precipitation every 30 minutes with a horizontal resolution of 0.1° latitude x 0.1° longitude.

Changed

L10: “compared against” -> “collocated with” ;

Changed

L11: remove “looking for coincident ... resulted from such comparison.” -> “A total of 16,881 COSMIC RO soundings are identified to be within the swath of the TRMM precipitation measurements (250 km), and within +/- 15 minutes.”

Corrected

It's confusing whether the collocation threshold "250 km" (i.e., swath size of TRMM) or "100km" as seen in L19 (Section 2.1)? Please clarify.

There is a difference here between when an event is collocated, i.e. within TRMM swath, and when there is or there is not precipitation in the surroundings of an event, i.e. using information from the closest pixels (within 100 km).

Page-3 – Sec.2.2

L03: spatial ... between +/-60 deg and every 30 min -> every 30 minute with spatial coverage between 60°S and 60°N

Changed

L12: remove "(IMERG data is ... 30 min)", which is redundant.

Removed

Page-3 – Sec.3

L10: for the two analyses and one reanalysis

Corrected

L18: The hexagon with a diameter of ~30 deg is used in Figure 3. What is the sampling looks like? What the minimum/maximum and average sampling number of the collocation within the hexagon?

If the sampling plot will not be shown, it needs to be mentioned/discussed in the text, to justify the choice of "30 deg".

I would expect it is primarily restricted by the sampling, but could it be possible to reduce the size of hexagon and show better spatial pattern?

It has been added to the text. We have increased the total number of observations including also the 2015 collocated observations, and now the hexagons have a diameter of 20 deg. We have included in the text the minimum and maximum number of observations per bin, and we believe that now it is more clear. With the new diameter of the hexagons, the spatial patterns are clearly seen and can be easily associated to regions known to have heavy precipitation.

L22: Revise sentence: "This figure shows the global distribution of the positive refractivity bias under heavy precipitation. The regional difference of the N-bias is evident and the difference among analyses and reanalysis is also shown."

Revised

Page-4

Figure 2 caption: The compared profiles are ..." -> The RO profiles are classified into no-rain (solid) and heavy rain (dashed) based on the collocated GPM IMERG precipitation measurements.

Corrected

The time range should be mentioned in the caption.

Corrected

Page-4 – Sec.3

L10: “The results have shown no ...” -> “The results (not shown) reveal no significant changes to the positive N-bias, and confirms that the RO observation geometry is not a contributing factor to the positive bias.

Changed

Page-4 – Sec.4

L21: For the case in this study

Corrected

L22: sum of the effects of all the raindrops

Corrected

L33: Reference needed for “Raindrops fall following gravity and are flattened ... oblateshape”.

Corrected

L04: What is the subscript 1, 2 refer to? Simply corresponding to “h, and v”? Need to be explained.

Corrected

L06: that is complex -> that is a complex number

Corrected

Page-5 – Sec.4

L35: The REFERENCE is needed for “The N(D) is obtained ... TRMM products...”

The reference has been added

L36: provide -> retrieve

Corrected

Page-6 – Sec.4 – Sec. 4.1

L20: It is a bit odd to see the sentence here. “In the left panel of Figure 4, ...induced phase delay.” It should be moved and integrated into the discussion of Figure 4 in Section 4.1, possibly after L04.

Corrected

Figure 4: I would suggest to use (a, b, c) to identify the three panels, which make it easier to discuss in the manuscript.

We have changed the figure to have a, b, and c labels on top of each panel.

Figure 4 deserves more discussion on each panel, especially the Fig. 4a (SNR plot). For example, what is the precipitation rate of the selected case, where, when, and how big is the precipitation feature? How typical is that compare to the other 62 cases?

A better description of figure 4 is included in Sec. 4.1.

Could the author(s) also add the excess phase delay without rain to be compared to the result (blue shaded) under heavy precipitation?

We have provided the order of magnitude of the total excess phase to be compared with the precipitation induced phase delay.

L08: effect into RO -> effect on RO

Corrected

L432: “The effect that liquid and solid water content has into the RO ... is to induce small errors such as those .. Figure 4.” -> “the effect of liquid/ice water content on RO refractivity retrieval results in small errors (??%, need numbers), which does not introduce obvious biases in both bending angle and refractivity (Figure 4b, c).

Corrected and errors provided

L435: “Thus, the fact that ...scenarios.” -> “Thus the scattering terms in Equation 1 should not be the cause for the positive N-bias in the presence of the heavy precipitation.”

Corrected

Page-6 – Sec.5

L439 – L457: The two paragraph were not well written and require some revision to improve the points.

Note the author(s) like to use the first person in the manuscript.

These two paragraphs have been rewritten.

L449: “We have done it for the three analyses/reanalyses” -> the two analyses and one reanalysis.

Corrected

L458: “This classification allows us to further .. scenarios:” -> “We further classify the collocated COSMIC RO profiles into four different categories.”

Corrected

L462: the criteria -> the threshold

Corrected

Page-7 – Sec.5

L474: I assume that using coarse resolution of “45 deg” instead of “30 deg” was due to the limited sampling? Please offer the description of the map of sampling after separating into four categories. Will the possibly low and un-even sampling affect the results?

Now the size of the bins is reduced due to the increment of the observations after including year 2015. We have included in the text the typical number of observations per bin at each category. Since the overall values for the bias and its global pattern have not changed significantly after incrementing the number observations, we are confident that the sampling is not affecting the results in a significant way.

L502: “the bias is larger in ~~the case~~ of ERA-interim ...but smaller in ~~the case~~ of ECMWF ... analysis, showing the different performance of model in characterizing precipitation.

Corrected

Last paragraph of Sec 5:

Not sure that is a correct interpretation. The physical model used in ERA-I reanalysis and ECMWF analysis should be pretty much the same. The major difference is the spatial resolution as well as the data assimilated. I would argue the resolution might be the major reason behind the difference. Please discuss and justify your reasoning.

We agree with the reviewer that spatial resolution definitely contributes to the differences among analyses. We mention that at the end of Sec 5 and we also add it to the discussion. In fact, here we are not addressing nor we want to reach any conclusion about why analyses and re-analyses perform the way they do. In this study we mainly want to point out that the refractivity bias between RO and analyses exist and, as opposed to previous studies conclusions, it might be due to the analyses and re-analysis information, which can be worth of future investigations.

# Assessment of GNSS radio occultation refractivity under heavy precipitation

Ramon Padullés<sup>1,2</sup>, Estel Cardellach<sup>2</sup>, Kuo-Nung Wang<sup>1</sup>, Chi O. Ao<sup>1</sup>, F. Joseph Turk<sup>1</sup>, and Manuel de la Torre-Juárez<sup>1</sup>

<sup>1</sup>Jet Propulsion Laboratory, California Institute of Technology, Pasadena, CA, USA.

<sup>2</sup>Institut de Ciències de l'Espai (IEEC-CSIC), Barcelona, Spain

**Correspondence:** Ramon Padullés (ramon.padulles.rullo@jpl.nasa.gov)

**Abstract.** A positive bias at heights between 3 and 8 km has been observed when comparing the radio occultation retrieved refractivity with that of meteorological analyses and re-analyses, in cases where heavy precipitation is present. The effect of precipitation in RO retrievals has been investigated as a potential cause of the bias, using precipitation measurements interpolated into the actual three dimensional RO raypaths to calculate the excess phase induced by precipitation. The study consisted in comparing the retrievals when such extra delay is removed from the actual measurement and when it is not. The results show how precipitation itself is not the cause of the positive bias. Instead, we show that the positive bias is linked to high specific humidity conditions regardless of precipitation. This study also shows a regional dependence of the bias. Furthermore, different analyses and re-analyses show a disagreement under high specific humidity conditions and in consequence, heavy precipitation.

## 1 Introduction

Radio Occultation (RO) technique uses opportunistic Global Navigation Satellite System (GNSS) signals to sound the atmosphere. The signal trajectory, travelling from GNSS satellites to Low Earth Orbiters (LEO), is bent due to the index of refraction gradients of the atmosphere. Such bending can be inferred using the phase derivative observable (Doppler shift) obtained by dedicated receivers in the LEOs. Under the assumption of a spherically symmetric atmosphere, the bending angle profile can be integrated to a vertical profile of the refractive index,  $n(h)$ , through Abel inversion (e.g. Kursinski et al., 1997; Hajj et al., 2002).

Refractivity is defined to account for the deviations of the index of refraction from unity, and is related to geophysical

parameters by (e.g. Thayer, 1974; Kursinski et al., 1997):

$$N(h) = (n(h) - 1) \times 10^6 = 77.6 \frac{P}{T} + 3.73 \times 10^5 \frac{e}{T^2} - 40.3 \times 10^6 \frac{n_e}{f^2} + O\left(\frac{1}{f^3}\right) + 1.4W_w + 0.6W_i \quad (1)$$

where  $P$  is the total pressure (mbar),  $T$  is temperature (K),  $e$  is the partial water vapour pressure (mbar),  $n_e$  is the electron density ( $\text{m}^{-3}$ ),  $f$  is the frequency (Hz), and  $W_{w,i}$  are the liquid and ice water contents ( $\text{g} \cdot \text{m}^{-3}$ ), respectively. These terms are classified as dry, wet, ionospheric and scattering terms. The dry term is dominant below 60-90 km, while the wet term becomes significant in the lower troposphere. The ionospheric term becomes dominant above 60-90 km, and its leading contribution is removed by a combination of two of the frequencies used by GNSS satellites (L1 = 1.575 GHz; L2 = 1.228 GHz) (Vorob'ev and Krasil'nikova, 1994). The scattering terms (i.e.  $W_{w,i}$ ) are generally much smaller compared to the other refractivity terms in the lower troposphere. Therefore, they are usually neglected in the retrieval of the atmospheric variables, and when RO measurements are assimilated into the Numerical Weather Prediction (NWP) models.

A commonly used method to retrieve temperature, pressure and water vapour from RO observations is the one dimensional variational retrieval (1DVAR). It consists in obtaining the most probable atmospheric variable combining a priori atmospheric information with the observations in a statistically optimal way (Healy and Eyre, 2000). Usually, these a priori values are obtained from global meteorological analyses or reanalyses. On the other hand, bending angle and refractivity profiles are directly assimilated into NWP (e.g. Healy et al., 2005; Cucurull et al., 2007), with a high positive impact in the weather forecasts (Cardinali and Healy, 2014).

An unavoidable link exists between NWP models and RO retrieved temperature, pressure and moisture, due to the fact



that RO products use a priori information from the models, and models assimilate RO observations. Yet, differences exist between their products, and its understanding is important in order to detect weaknesses and potentially improve the performance of models.

In this study we compare RO refractivity observations with the global weather analyses and re-analyses, in the presence of precipitation. These analyses have coarse spatial resolution, which has a direct impact in the treatment of heavy precipitation. At these scales, convective processes need to be parametrized. In turn, convective parametrization (CP) has been identified as one of the major source of errors in the modelling of heavy precipitation (e.g. Arakawa, 2004). RO technique offers unique potential to study the interaction between heavy precipitation and vertical thermodynamic processes within the atmosphere, since their signals can penetrate into thick clouds and their products have high vertical resolution. Recent investigations by Cardellach et al. (2014, 2017) and Padullés et al. (2016) have shown potential to retrieve vertical precipitation information adapting RO receivers to collect polarimetric observables (Pol-RO). Therefore, Pol-RO emerge as a technique that could provide relevant simultaneous information of precipitation and thermodynamics (e.g. moisture), to advance in the understanding of the processes linking vertical structure of moisture and heavy precipitation.

While such products are not yet available, in this study we investigate precipitation induced features in standard (non-polarimetric) RO products using collocations (i.e. space and time coincidences) between the COSMIC/FORMOSAT-3 mission (Anthes et al., 2008) and the Tropical Rainfall Measurement Mission (TRMM) (Kummerow et al., 2000) and Global Precipitation Measurement (GPM) (Hou et al., 2014) missions, and we compare such features with those of analyses and re-analyses. The refractivity from analyses and re-analyses is derived using the temperature, pressure and moisture that they provide, and Equation 1.

A clear positive bias in the RO refractivity with respect to that of some weather analyses and re-analyses is observed between 3 and 8 km height when precipitation is present in the surroundings of the observation. Previous studies have noted similar biases, for example Lin et al. (2010); Yang and Zou (2012); Zou et al. (2012); Yang and Zou (2016). These studies linked the bias with the liquid and ice water content present in the observation site, suggesting that the scattering term from Equation 1 should not be neglected, but used to correct RO refractivity observations instead. However, our approach in this study is different and takes into account the 3-D structure of precipitating medium. Here, the impact of precipitation is assessed directly in the Doppler shift observable, using three dimensional collocations of precipitation structures and realistic RO ray trajectories, together with computational simulations of the effect of the scattering of the propagating signal by liquid and solid water particles. Afterwards, the causes of the observed bias are discussed

with focus on the performance of the used analyses and re-analyses, especially under high specific humidity conditions. The reason to proceed this way is because solely comparing the RO observations with data from analyses and re-analyses, one could not make a clear distinction on whether the bias is due to the observation technique limitations or the weather analyses limitations.

This paper is structured in the following way. The details of the data and collocations used for this study are explained in section 2. In section 3 the bias in the comparison between RO observations and analyses and re-analyses is introduced. section 4 presents the results of the assessment of the precipitation induced delay into the RO observables. And in section 5 the specific humidity is assessed as the source of the refractivity bias. Finally, section 6 contains a discussion on the results.

## 2 RO, analyses, and precipitation data

The COSMIC/FORMOSAT-3 RO products are obtained from the University Corporation for Atmospheric Research (UCAR) COSMIC Data Analysis and Archive Center (CDAAC). The observed RO refractivity is obtained from the Level-2 wetPrf products, along with the retrieved temperature, pressure, and water vapour partial pressure at every 0.1 km of altitude, between surface level and 20 km. The observed refractivity included in the wetPrf files is the same product as in the atmPrf files, provided here at the same height levels as the other thermodynamic products. These observations are collocated with the European Center for Medium range Weather Forecast (ECMWF) ERA Interim re-analysis (e.g. Dee et al., 2011), the ECMWF high resolution operational analysis, and the National Centers for Environmental Prediction (NCEP) operational analysis, the Global Forecast System (GFS) (NOAA/NCEP, 2003). These collocated profiles are obtained also at the CDAAC in the Level-2 eraPrf, echPrf and gfsPrf products, respectively. The RO products are interpolated into the analyses height levels when the comparisons are performed.

Data from the TRMM and GPM precipitation missions are obtained from the NASA Goddard Earth Sciences Data and Information Services Center (GES DISC). The TRMM data used here is the Level-2 orbital 2B31 products, that provide vertical structure information of precipitation and has a limited swath coverage. The used GPM data is the final run of the Integrated Multi-satellite Retrievals for GPM (IMERG) products (Huffman et al., 2017), that provide surface rain rate for the region comprised between  $\pm 60^\circ$  latitude. In order to assess the precipitation intensity and structural characteristics, data from the vertically profiling TRMM radar are used, while the GPM IMERG data is used to increase the statistics. The TRMM 2B31 products provide precipitation information for the region sensed by the TRMM Precipitation Radar (PR), such as rain rate, with a swath of approximately 250

km, a horizontal resolution of  $5 \times 5$  km, and a vertical resolution of 250 m. The IMERG product provides an estimate of the global surface precipitation with an every 30 minutes with a horizontal resolution of  $0.1^\circ$  latitude  $\times$   $0.1^\circ$  and every 30 minutes longitude.

For this study, the precipitation information comes solely from the TRMM and GPM retrieved products, and no precipitation information is used nor assumed from the analyses and re-analyses. Therefore, the analyses and re-analysis products might or might not be associated to different precipitation conditions when their products are generated. However, it is not the aim of this work to assess the ability of analyses to reproduce precipitation, but to evaluate and compare the RO products with their provided thermodynamic fields for a given location and time in the actual presence or absence of precipitation. Nevertheless, we consider that this could lead to minor effects solely, since the water vapor field is spatio-temporally smoother than the cloud water content field.

## 2.1 Collocations with the TRMM PR

The COSMIC/FORMOSAT-3 RO products between 2006 and 2015 were compared against collocated with TRMM orbital products looking for coincident observations in space (RO soundings). A total of 16,881 COSMIC RO soundings are identified to be within the swath of the TRMM precipitation measurements (250 km), and within TRMM swath -) and time (both observations within  $\pm 15$  minutes). After 2013, the number of COSMIC/FORMOSAT-3 RO observations dropped significantly. However, the quality and distribution of the observations was not affected. 16,881 collocated events resulted from such comparison. These events were then classified depending on the presence or not of precipitation and its intensity. Henceforth, each event is linked to the number of pixels of the TRMM radar with a reflectivity (Z) larger than 30 dBZ, used as a proxy for heavy precipitation events, in the surroundings (100 km) of the occultation location within the radar swath.

For each event with evidences of precipitation in its surroundings, the approximated RO ray trajectories have been simulated using ray-tracing techniques and geo-located together with the radar retrieved 3 dimensional reflectivity observations. Therefore, it has been is possible to interpolate the precipitation information into the set of RO ray trajectories. An example of such interpolation is shown in Figure 1. We can therefore estimate the amount of precipitation crossed by each of the rays, estimate its effect, and compare it with the actual RO observables such as the excess phase (or the Doppler shift), the Signal to Noise Ratio (SNR) or the atmospheric vertical retrievals. We use this information to assess the impact of precipitation into the RO signal propagation and its retrievals, as described in section 4.

It is worth mentioning that in this study we focus on the effect of rain and hydrometeors large enough to exhibit

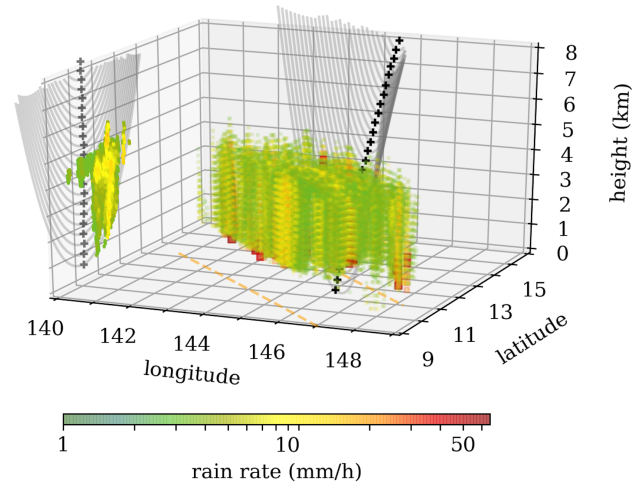

**Figure 1.** Three dimensional collocation of a RO event with a TRMM PR precipitation measurement. It corresponds to the coincidence between the C004.2006.329.22.20.G19 RO event and the 2B31.20061125.51450 TRMM PR product. Here the precipitation structure is shown in a 3 dimensional grid, along with the set of RO ray trajectories (in gray). Black stars indicate the tangent point of the rays. Only a few rays are shown for illustration purposes. The orange dashed lines indicate the edges of the TRMM PR swath. The interpolated precipitation information (rain rate) into the RO plane is shown in the 2-Dimensional projection in the latitude-height plane.

a significant reflectivity signature in the TRMM radar retrievals (working at Ku-band), which in its turn are the ones we expect to have the largest impact on RO retrievals. The scattering effects of smaller particles, specially above the melting layer, have larger uncertainty and must be treated carefully.

## 2.2 Collocations with GPM IMERG

In order to improve the statistics of collocated profiles we have performed a larger scale collocation using the GPM IMERG products (every 30 minute with spatial coverage between  $\pm 60^\circ$  deg and every 30 min  $^\circ$ S and  $60^\circ$ N) and all the COSMIC/FORMOSAT-3 RO products of 2015 and 2016. We can greatly expand the number of collocations by considering only the surface precipitation rate. For each of the COSMIC/FORMOSAT-3 RO events, the corresponding IMERG product has been identified, and the precipitation retrieval has been linked to the RO event. This results in 259,231 481,252 RO events from which the surface precipitation in its surroundings has been identified, with a time resolution of  $\pm 15$  min (IMERG data is provided for every 30 min). For each event, the mean rain rate, the maximum rain rate and the number of pixels with non-zero rain rate, in a region of  $2^\circ \times 2^\circ$ , is stored along with the vertical RO profiles of refractivity, temperature, pressure, water vapour pressure,

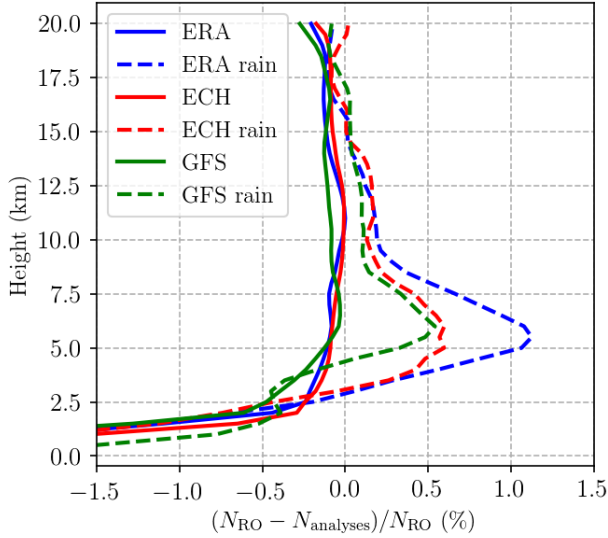

**Figure 2.** Fractional difference between the RO observed refractivity and that from (blue) Era interim re-analysis; (red) ECMWF high resolution analysis; and (green) NCEP GFS operational analysis. The compared RO profiles are classified between into no-rain profiles (solid lines) and heavy rain profiles (dashed lines) according to based on the collocated GPM IMERG collocations precipitation measurements (see subsection 2.2). These data correspond to 2016.

and the corresponding collocated weather analyses and re-analyses products.

### 3 Refractivity bias

A clear positive refractivity bias is observed between  $\sim 3$  and  $\sim 8$  km of altitude when precipitation is present in the occultation position, with respect to the refractivity from weather analyses and re-analyses. In Figure 2 the bias is shown, for the comparison between the GPM IMERG collocated RO products and the three different analyses and re-analyses introduced in section 2. In this case, the data are separated according to the amount of rain in the surroundings: events with no rain (no-rain profiles) and events where  $\langle R \rangle > 10$  (mm/h) in the  $2^\circ \times 2^\circ$  surrounding area.

While the bias is clearly seen for the three analyses and re-analyses for the two analyses and one reanalysis used in the comparison, their performance within heavy precipitation is also different. When precipitation is not present close by the RO sounding, the RO refractivity and that of analyses and re-analyses agree (i.e. no significant bias), as well as among themselves.

In Figure 3 we show the regional dependence of the bias, at a height of 6 km. Through the paper we focus on the height range around 6 km because it is where the bias is maximum, as seen in Figure 2. Here, the globe is divided in hexagons with a diameter of approximately  $30$ – $20$  degrees, and the

events are separated according to their  $\langle R \rangle$ :  $\langle R \rangle = 0$  mm/h;  $0 < \langle R \rangle < 5$  mm/h; and  $\langle R \rangle > 5$  mm/h. This separation is shown at each different column, while the rows separate the analyses or re-analyses used in the comparison. The size of the hexagons is chosen so that all of them contain a significant number of observations and spatial patterns are clearly seen. Only those bins with a minimum of 25 observations inside them are shown, and the typical range of observations inside the bins is between 1,000 and 7,000 observations per bin for the no-rain scenarios, between 200 and 1,600 observations per bin in the low rain regime, and between 25 and 150 observations per bin in the heavy rain regime. This figure shows how the positive bias is present globally under heavy precipitation, although is larger in certain regions, and it depends on the analysis in use. Common features for all three re-analyses are, for example, the positive bias under heavy precipitation that is present in the West Pacific warm pool, the eastern part of the pacific, south Indian ocean, the equatorial part of the Atlantic, and over South America and central Africa. These regions are associated to extreme precipitation features (Liu and Zipser, 2015), either to large extension precipitation events or to precipitation systems with a high deep convective cores.

Besides the positive bias in the region above an altitude of 4 km, a negative bias is also clearly observed below 3 km, both for the rainy and no-rain events. This bias is not assessed here, since it has already been discussed previously in other studies (e.g. Ao et al., 2003; Sokolovskiy, 2003; Xie et al., 2006, 2012; Wang et al., 2017). Similarly, other potential sources of bias have been checked, for example, the angle of incidence of the occultation ray to the receiver, with respect to the transmitter position. The larger the angle, the larger the tangent point drift. This implies that the theoretical spherically symmetric atmosphere could depart from a realistic approximation and induce errors in the retrievals (Foelsche et al., 2011). Also, large incident angles correspond to low SNRs, which could be introducing positive biases (Sokolovskiy et al., 2010). Therefore, the positive bias has been checked grouping the occultation events according to its azimuth angle, in addition to rain variables. The results have shown (not shown) reveal no significant changes for the positive bias, hence the geometry of the observations is excluded as an explanation for the to the positive N-bias, and confirms that the RO observation geometry is not a contributing factor to the positive bias.

### 4 Precipitation induced delay

Once other observational known issues are discarded as plausible sources of the bias, the influence of the scattering term in Equation 1 is assessed. In order to further investigate its importance, we have simulated the contribution of the liquid and solid water directly into the excess phase. This is accomplished using 3-Dimensional collocations between the

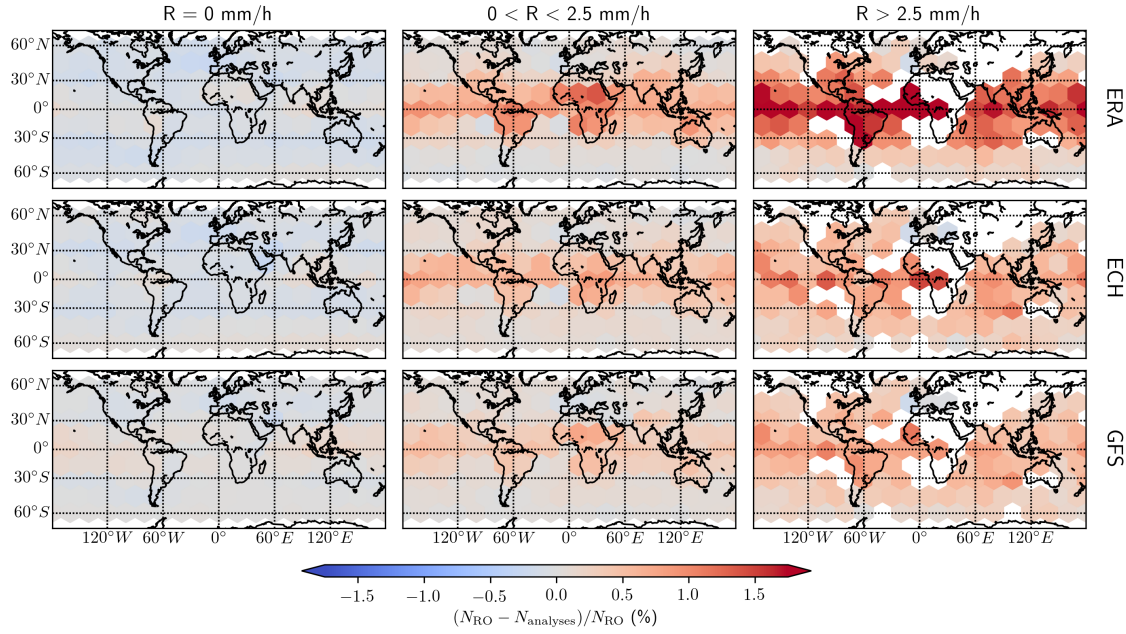

**Figure 3.** Regional averaged fractional difference between the RO observed refractivity and that from (top row) Era interim re-analysis; (middle row) ECMWF high resolution analysis; and (bottom row) NCEP GFS operational analysis; for a height of 6 km. The compared profiles are classified between no-rain profiles (left column;  $\langle R \rangle = 0$  mm/h), low and moderate precipitation (middle column;  $0 < \langle R \rangle < 2.5$  mm/h) and heavy rain profiles (right column;  $\langle R \rangle > 2.5$  mm/h). The grid corresponds to hexagons with a diameter of about 30–20 deg. Only those with a minimum of 25 observations inside them are shown.

COSMIC/FORMOSAT-3 RO observations and the TRMM PR measurements, which have allowed us to perform realistic simulations of the effects of precipitation in actual RO observables (see Figure 1). This represents a novel approach to the assessment of the positive refractivity bias with respect to previous studies.

The contribution from precipitation on the phase delay of the signal is due to the scattering of the propagating wave by non-spherical raindrops. The delay induced by raindrops (or frozen hydrometeors) with respect to that of free space can be linked to the scattering term of refractivity in Equation 1. For the case in this study, the coherent propagation of plane waves is described as the sum of the effects of all the raindrops in a unit volume with various sizes. Formally, the scattered field can be expressed as:

$$E^s = T E^i \quad (2)$$

where  $E^i$  is the incident field,  $E^s$  is the scattered field, and  $T$  is the "transmission matrix" describing the characteristics of the rain medium (Oguchi, 1983). The propagation through rain can be considered as a propagation through an effective medium with two characteristic axes, characterized by the two eigenvalues of  $T$ ,  $\lambda_1$  and  $\lambda_2$ :

$$T = \begin{bmatrix} e^{\lambda_1 l} & 0 \\ 0 & e^{\lambda_2 l} \end{bmatrix} \quad (3)$$

where  $l$  is the propagated distance.

Raindrops fall following gravity and are flattened due to the air drag, becoming approximately oblate-shaped (e.g. Pruppacher and Beard, 1970; Beard and Chuang, 1987). Here we do not take into account the canting angle effect (raindrops being tilted by wind), for simplicity and because in this situation its effect is secondary. Therefore,  $\lambda_{1,2} = -i k_{\text{eff}}^{h,v}$ , where the  $k_{\text{eff}}$  is the effective propagation constant of the medium, that is complex, and  $h$  and  $v$  number, and 1 and 2 indicate the characteristic axes of the medium. For the case in this study, the two characteristic axes correspond to  $h$  and  $v$  (horizontal and vertical).

The effective propagation constant can be expressed as (e.g. Bringi and Chandrasekar, 2001):

$$k_{\text{eff}} = k_0 + \frac{2\pi n_p}{k_0} e_i f(\hat{i}, \hat{i}) \quad (4)$$

where  $k_0$  is the propagation constant in the homogeneous atmosphere,  $n_p$  is the number of particles per unit volume,  $e_i$  indicates the unit polarization vector for the linear states, and  $f(\hat{i}, \hat{i})$  is the scattering amplitude vector in the forward scattering configuration. The real part of the effective propagation constant induces a phase shift, while the imaginary part induces an attenuation. At L-band, the attenuation due to the scattering by rain can be neglected. The expression of  $k_{\text{eff}}$  is defined for a number of identical particles, but can be generalized to a size distribution of particles defined by  $N(D)$ . Also, the  $f(\hat{i}, \hat{i})$  can be expressed as the Scattering ampli-



tude matrix,  $S$ , using the Jones notation (Jones, 1941). The scattering amplitude matrix ( $2 \times 2$ ) relates the scattered field components to the incident field components in the far field approximation. For a right hand circularly polarized (RHCP) propagating field, as it correspond to GNSS transmitted signals, a mean effective propagation constant can be defined by:

$$k_{\text{eff}}^{\text{mean}} = \left( \frac{k_{\text{eff}}^h + k_{\text{eff}}^v}{2} \right), \quad (5)$$

hence, the specific phase shift induced only by the raindrops to a circularly polarized incident wave is:

$$\Delta\Phi^{\text{rain}} = \left( \frac{\lambda}{2\pi} \right) \frac{2\pi}{k_0} \int \Re \left\{ \frac{S_{hh}(D) + S_{vv}(D)}{2} \right\} N(D) dD \quad (6)$$

in units of  $\text{mm} \cdot \text{km}^{-1}$ , where  $\lambda$  is the wavelength (mm),  $S_{hh, vv}$  are the co-polar components of the forward scattering amplitude matrix in a linear base of polarization,  $N(D)$  is the particle size distribution ( $\text{mm}^{-1}\text{m}^{-3}$ ), and  $D$  is the diameter of the particles (mm). The forward scattering amplitude matrix is computed for each scatterer, and depends on the scatterer's size, composition, orientation, and shape (see Bringi and Chandrasekar (2001) for a detailed explanation). For this study, the T-matrix code is used in order to compute  $S$  for raindrops of all sizes between 0.1 and 8 mm of diameter (Mishchenko et al., 1996). For the particle shapes, the Beard and Chuang (1987) model is used, which relates the diameter of the each particle with the relationship between its two characteristic dimensions (i.e. its axis ratio). The complex permittivity for liquid water is obtained from Liebe et al. (1991). The  $N(D)$  is obtained at each point from the TRMM products  $\tau$  using the same one used to provide retrieve rain rate from the TRMM PR reflectivity measurements, which is usually approximated with a gamma model (e.g. Kozu et al., 2009).

Using the three dimensional collocations we can therefore compute the phase delay that is solely due to precipitation, in the following way:

- For each collocated event, we have the precipitation information interpolated into the set of RO ray trajectories. The precipitation information (for example, rain rate, water content, etc.), directly or indirectly, is used to infer the  $N(D)$  at each point of these trajectories.
- With the  $N(D)$ , we can compute the specific  $\Delta\Phi^{\text{rain}}$  along each ray using Equation 6, and integrate this quantity along each ray path:

$$\Phi^{\text{rain}} = \int_L \Delta\Phi^{\text{rain}}(l) dl \quad (7)$$

in units of mm, where  $L$  is the ray-path length in km.

For each occultation event that has been 3-d collocated with the TRMM PR, we can have the approximate vertical profiles of precipitation induced delay along with all the currently provided information, such as the total excess phase delay, the strength of the signal, and the retrieved vertical thermodynamic products. In the left panel of we show an example of an occultation actual SNR together with the precipitation induced phase delay. To give the reader a context, the ray-paths length below 15 km can be of the order of hundreds of kilometers, and therefore the amount of liquid water content that is crossed is significant. In big precipitating systems, the total integrated liquid water content along the ray-paths can exceed  $50 \text{ kg} \cdot \text{m}^{-2}$ .

#### 4.1 Precipitation induced phase delay impact

In this section we want to assess the impact that the precipitation induced phase delay has on RO retrievals. To do so we have designed a study that consists in retrieving the bending angle (Phase Matching method (Jensen et al., 2003)) and refractivity (inverse Abel transform (Fjeldbo et al., 1971)) profiles from the total excess phase delay to compare it with the retrieval results when the precipitation induced delays are removed from the original total excess phase. Therefore, the precipitation induced delays obtained in the previous section are removed from the actually observed phase delays, obtaining two profiles called the rain (original) and the rain-free (where the precipitation induced delay has been removed).

The bending angle and refractivity retrieval were attempted on both rain and rain-free excess phases from a total of 65 cases collocated with heavy precipitation events. The bending angle profiles calculated by Phase Matching were smoothed with 200m windows and compared in the same impact height (corresponding impact parameter minus the collocated radius of Earth).

An example of one of the 65 collocated cases is shown in Figure 4. In panel (a) of Figure 4 we show an example of the actual occultation SNR (black) together with the precipitation induced phase delay (blue shaded), as a function of time with respect to the start of the occultation. Note that the maximum precipitation induced phase delay is of the order of hundreds of millimeters, while the total excess phase at the lower layers of the atmosphere is of the order of kilometers. This case corresponds to a precipitating cell in the Indian ocean ( $11^\circ\text{N}$  and  $72^\circ\text{E}$ ), with an approximate extension of  $10,000 \text{ km}^2$  and rain rate exceeding  $20 \text{ mm/h}$ . The combination of extension and intensity makes this case an interesting one, inducing an excess phase larger than  $110 \text{ mm}$ . The cases selected for this work are those with the largest precipitation induced excess phase, and are all around  $100 \text{ mm}$ . They are representative of the variety of collocated cases, combining different intensities and extensions.

In panels (b) and (c) of Figure 4 we show the mean (black line) and standard deviation (orange shade) of the difference between the retrieval using the actual measurements and

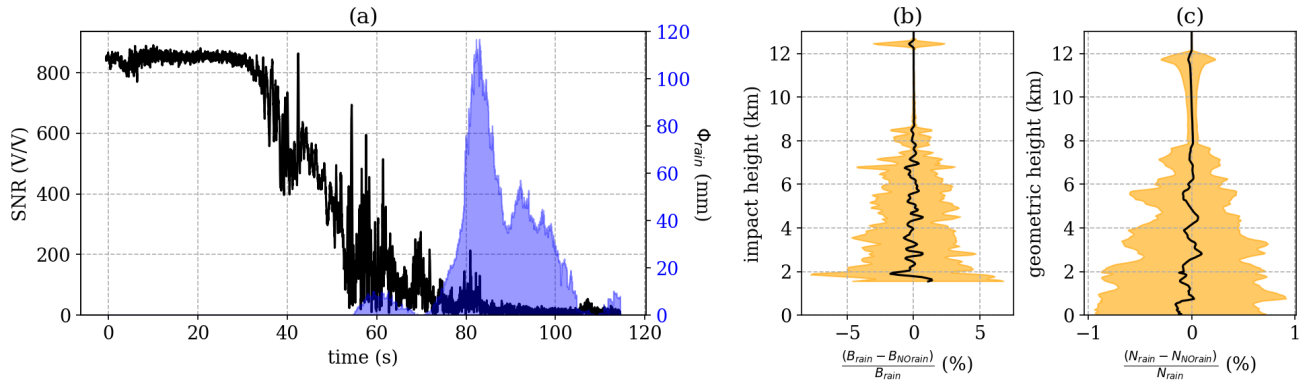

**Figure 4.** (left) Actual SNR (black) corresponding to the RO event C001.2008.345.00.43.G03 (UCAR id), along with the simulated precipitation induced phase delay (blue) as a function of time; (right) Fractional bending angle and refractivity differences between the outputs from the retrieval using the rain-affected profiles and the rain-removed ones, as a function of the impact height (bending angle) and of the geometric height (refractivity). Black lines represent the mean of the 65 cases, while orange shade is the standard deviation.

those after removing the precipitation induced excess phase, both for bending angle (panel b) as a function of the impact height and refractivity (panel c) as a function of geometric height. Because of the integration nature of inverse Abel transform, the standard deviation (orange shade in right panels panels (b) and (c) of Figure 4) in the retrieved refractivity is much smoother than the one in bending angle profiles. If precipitation had a systematic effect ~~into-on~~ RO phase delays, a positive bias would be observed in the rain-affected bending angle and refractivity when compared with the rain free bending and refractivity for the same case. However, this effect is absent in the right panels of Figure 4.

The results of nonexistent mean positive bias shown in the right panels of Figure 4 suggest that the positive bias found in the retrieved refractivity compared to the weather analyses and re-analyses is not due to the neglect of the scattering term in the refractivity. Furthermore, it can be seen how on average, the impact of taking / not taking into account the precipitation induced delays when assessing the retrieval increases the variability, implying that the changes of removing precipitation contribution from the signal propagation can be both positive and negative, rather than only negative. Since the bending angle and refractivity retrieval process depends mostly on the vertical gradient of the excess phase, the precipitation induced excess Doppler, which can be positive or negative, will on average lead to unbiased retrieval results. This extra excess Doppler can be seen as the result of local horizontal inhomogeneity in the refractivity field.

Differently from temperature and pressure, the liquid and ice water content is localized in a small region (compared to the ray travel distance), and might not be contributing along the whole propagation ray-path of an occultation. Furthermore, the region where liquid and ice water is present might be far from the tangent point. Yet, the refractivity retrieved from a RO observation is located around the RO tan-

gent point, and considered to have an horizontal resolution of about 200 km (e.g. Kursinski et al., 1997). Even though the RO observations are integral quantities, most of the contribution from dry and wet air in the bending angle comes from near the tangent point.

In addition, the RO retrievals rely on the spherical symmetric atmosphere approximation. While it has been proven to work properly for the standard RO thermodynamic products, liquid and ~~solid-ice~~ water content contributions to the excess phase cannot be well captured under such assumption. In consequence, the effect ~~that liquid and solid water content has into the RO retrieved refractivity profiles is to induce small errors such as those characterized in the right panel of of liquid/ice water content on RO refractivity retrieval results in small errors (e.g. less than 1% in refractivity standard deviation), which does not introduce obvious biases in both bending angle and refractivity~~ Figure 4. Thus, ~~the fact that the the scattering terms in Equation 1 are not taken into account is not should not be~~ the cause for the positive ~~refractivity bias observed under heavy precipitation scenarios~~ N-bias in the presence of heavy precipitation.

## 5 Specific humidity as a source of refractivity bias

~~Once the~~ In the previous section we have shown that the scattering term in Equation 1 ~~has been discarded as the main source should not be the main cause~~ for the refractivity bias; ~~another hypothesis is tested in this section. That is, In this section we test another hypothesis: the bias comes from the problems of large scale analyses and re-analyses have problems representing the thermodynamic variables linked to heavy precipitation scenes, in particular in representing the thermodynamics of precipitation scenarios, specially under high specific humidity conditions.~~

Using We have used the data described in subsection 2.2, we have studied to assess the refractivity bias as a function of the RO retrieved specific humidity. In turn, these cases are also separated between whether precipitation was present in the surroundings of the observation or not. We have done it for the three analyses /re-analyses: the ERA-interim, the, for precipitating and non-precipitating scenarios. In Figure 5 we show the results for the two analyses (ECMWF high resolution analysis and the GFS, and the results are shown in . Revealing results can be found here: the refractivity fractional difference increases and GFS operational analyses) and one re-analysis (ERA-Interim). We can see how the fractional refractivity difference increase with specific humidity, regardless of precipitation. Hence Therefore, the refractivity bias is linked to high specific humidity rather than more correlated with increasing specific humidity than with precipitation itself. However, high specific humidity conditions are strongly correlated with associated to precipitation.

This classification allows us to further investigate four different scenarios. We further classify the collocated COSMIC RO profiles into four different categories: no rain with low specific humidity conditions; no rain with high specific humidity; rain with low specific humidity; and rain with high specific humidity. In this case, the criteria threshold for low and high specific humidity is that the RO retrieved  $q$  is lower than 0.5 g/kg and higher than 2.7 g/kg, respectively, in the cases with no rain, and that the RO retrieved  $q$  is lower than 1.0–0.5 g/kg and higher than 2.7 g/kg, respectively, in the cases with rain. The  $q$  and the fractional refractivity difference are evaluated at a height of 6.5 km. These thresholds are based on the lower and higher 20th and 80th percentiles of data with no rain and rain. For these four classifications, the regional fractional refractivity differences are shown in Figure 6, for the comparison with ERA-interim re-analysis, ECMWF high resolution analysis and the GFS analysis. Here the globe is divided in hexagons of a diameter of 45 deg, 30 deg, and only those with a minimum of 15 observations inside are shown. The typical range of observations per bin is between 800 and 10,000 for the no rain with low specific humidity scenarios, between 15 and 600 for the no rain and high specific humidity regimes, between 15 and 80 for the rain with low specific humidity, and between 15 and 250 for the rain and high specific humidity regimes.

The results in Figure 6 confirm the results anticipated in Figure 5, i.e. the fractional refractivity bias can be linked to high specific humidity conditions rather than to precipitation itself. From the regional dependence of the fractional refractivity bias some other conclusions can be extracted. The first one is that when there is no rain and the specific humidity is low, the fractional refractivity difference is very small regardless of location and the analyses in use.

The second conclusion one can extract from Figure 6 is that when specific humidity is high, the fractional refractivity difference is positive and reaches large values ( $> 1\%$ ), for all the analyses in use and regardless of the presence of pre-

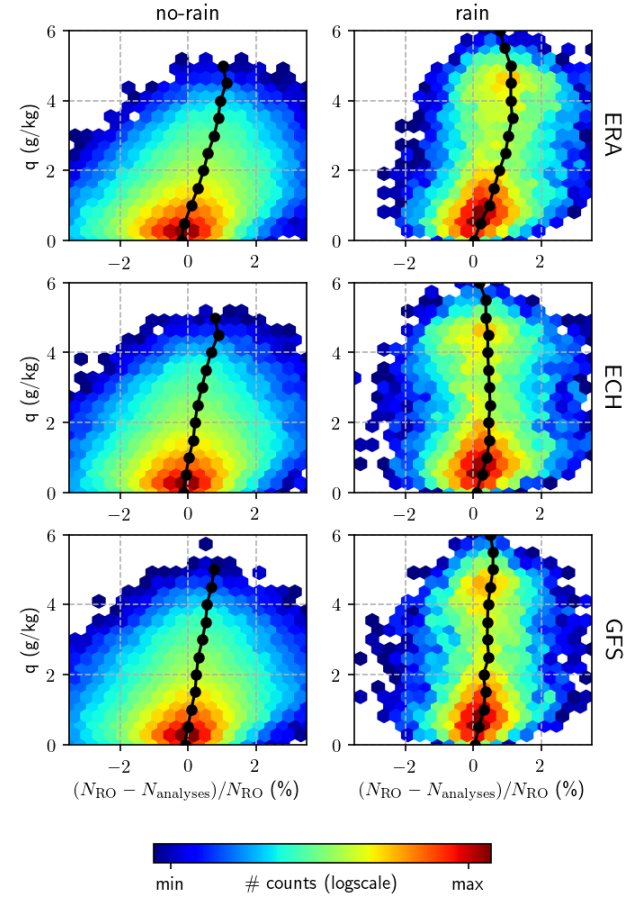

**Figure 5.** Fractional refractivity difference between the observations and analyses as a function of the observed specific humidity at a height of 6 km. The left column corresponds to the no-rain cases and the right column corresponds to the rain cases. The top row shows the results for the comparison of observations and ERA-interim, the middle row show the results for ECMWF high resolution analysis and the bottom row shows the results for the GFS.

cipitation. In particular, high specific humidity observations are concentrated in the tropics, so the largest positive refractivity bias are in this region, in agreement with Figure 3.

The third conclusion is that precipitation under low specific humidity conditions is rarely observed in the tropics. Under these conditions, the fractional refractivity difference has a more complicated behavior, more model-dependent than the rest of the cases. In this case, and no clear positive bias is observed, but a variability depending on the location of the observations.

The only situation with a prominent negative bias is observed under this scenario in the west area of Africa.

Finally, even though in addition to the positive fractional refractivity difference bias can be linked to high specific humidity conditions, we show that it is also dependent on the analysis in use. For example, the bias is larger in the case of ERA-interim ERA-Interim re-analysis, but



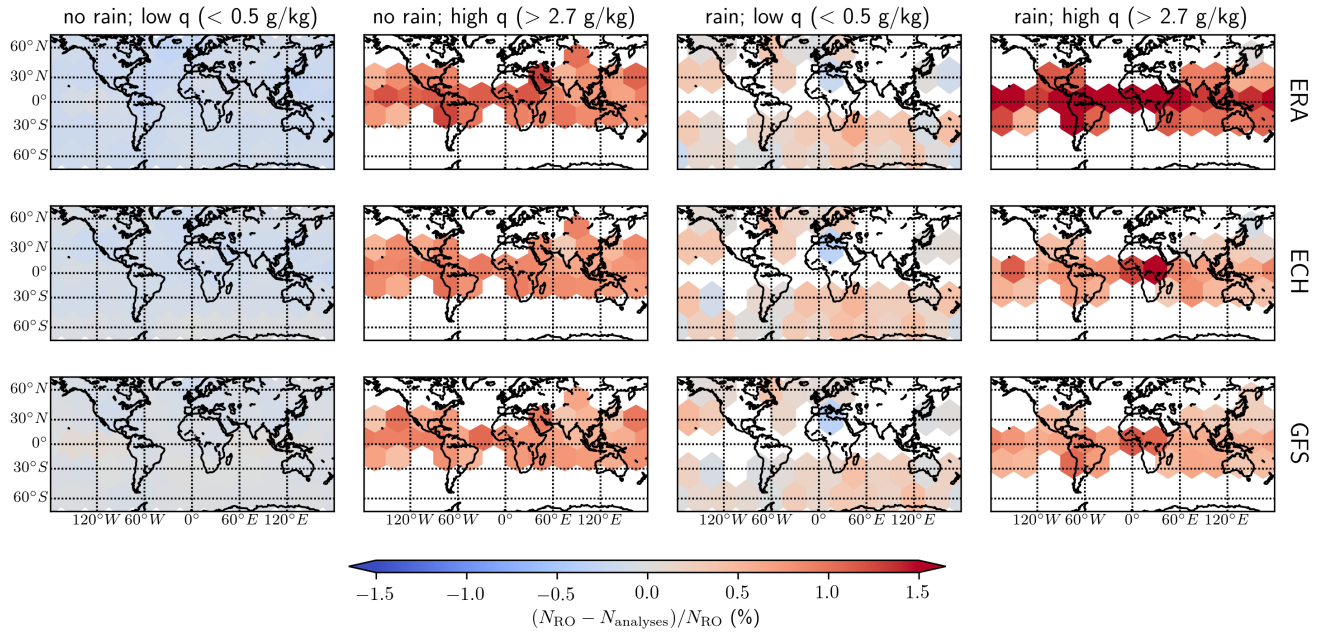

**Figure 6.** Regional averaged differences (colorscale) between the observed and the analysis refractivity. The first row corresponds to ERA interim, the middle row corresponds to ECMWF high resolution and the bottom one to the GFS. The two left rows corresponds to the free of rain data, where in the first row the observed specific humidity at a height of 6.5 km is lower than 0.5 g/kg, and in the second row it is larger than 2.7 g/kg. The two right columns represent rain affected data, where in the third column the observed specific humidity at a height of 6.5 km is lower than 0.5 g/kg, and in the last row it is larger than 2.7 g/kg. The grid here corresponds to hexagons with a diameter of 45–30 deg. Only those with a minimum of 15 observations inside them are shown.

smaller in the case of than in ECMWF high resolution analysis and GFS operational analysis, showing the different performance of models in characterizing precipitation the analyses and re-analysis, with a smaller bias for the higher resolution analyses. On the other hand, for no rain and low specific humidity, the performance of the different analyses and re-analysis is similar. The Overall, the fact that the ERA bias is positive is an indication that models tend to be biased dry. This is in agreement with Hersbach et al. (2015), which attributed the bias who noticed a dry bias in ERA-Interim which was attributed to a problem in assimilating microwave radiances affected by rain.

## 6 Summary and discussion

A systematic positive bias in the fractional refractivity difference has been identified when comparing RO retrieved refractivity with that of weather analysis and re-analysis when heavy precipitation was present in the surroundings of the observation. In this paper, the bias has been shown to be linked to the performance of models under high specific humidity conditions rather than with precipitation itself.

This conclusion has been reached after: (1) assessing the impact of precipitation directly into the RO observables (e.g. Doppler shift and bending angle), simulating the contribution

of realistic three dimensional precipitation structures into the actual RO ray trajectories, and comparing the retrievals after such a contribution is removed; and (2) evaluating the refractivity bias between RO observations and weather analyses under different humidity and precipitation conditions. This approach is novel with respect to previous studies assessing the same bias.

First, precipitation has been shown to have little impact on the positive fractional refractivity bias between RO observations and analyses and re-analyses. Differences in bending angle and refractivity between rain and rain-removed profiles can be both positive and negative, with no clear bias on average (see right panels in Figure 4). If precipitation, through the scattering term in Equation 1, had a systematic positive impact into the RO retrieved refractivity with respect to when precipitation is not present, the study performed in subsection 4.1 would have shown a positive bias as well. Therefore, precipitation itself does not explain such an impact, but the combination of thermodynamic variables associated with heavy precipitation, might. This statement does not mean that precipitation does not enhance the local refractivity where it occurs (which it is), but that such local enhancements do not necessarily lead to a bias.

The fractional refractivity bias between RO observations and analyses has been linked to high specific humidity conditions. The bias appears both in rain and no-rain conditions,



and it depends on the [analysis analyses](#) and on the geographic region. The [spatial resolution of the analyses and re-analyses](#) may also be a factor, since ERA-Interim shows a larger bias than ECMWF high resolution analysis, although they [should be based on the same physical model](#). However, both ECMWF high resolution and GFS operational analyses still exhibit a significant N-bias with increasing humidity. The fact that the bias is not seen in Figure 2 for the no-rain cases is because most of the no-rain cases have low specific humidity conditions, and they weight much more for the mean value of the fractional refractivity difference. On the other hand, the rain cases have a larger contribution in the high specific humidity region (see Figure 5), contributed mostly by tropical precipitation. This is also seen in the right panels in Figure 6, where precipitation with very high specific humidity conditions is mostly observed around the equator.

The bias in fractional refractivity between observations and analyses implies that the retrieved temperature and moisture will be also biased with respect to models. The positive refractivity bias is associated with a combination of colder retrieved temperature with respect to analyses, and a higher retrieved specific humidity than the one in the analyses. [This is consistent with Vergados et al. \(2015\), who showed that ERA-interim is systematically drier than RO in the tropics](#). Also, the fact that a difference exists between the different analyses used for this study, and that RO thermodynamic retrievals depend on the [model analyses or re-analysis](#) in use, imply that a difference between the retrievals obtained by different processing centers will exist under such conditions if they use different [models analyses or re-analyses](#).

These results stress the need for a better thermodynamic characterization of high specific humidity scenarios, likely to be associated to heavy precipitation. [Large-scale models](#) [The heights at which the bias is maximum is also consistent with the findings of, e.g. Holloway and Neelin \(2009\), who argue that heavy precipitation is controlled by the free tropospheric water vapor, and this dependence is not well captured in large scale models](#). These models are known to have issues with the parameterization of convective processes, hence further investigation in this direction is required. This is the aim of polarimetric radio occultations, which will provide joint products of temperature, pressure, moisture and an indication of the amount of precipitation (mostly sensitive to the heaviest) at each vertical level (Cardellach et al., 2017) with the objective to advance in the understanding of heavy precipitation events, closely linked with high specific humidity conditions. Alternatively, further investigations are being conducted with the aim to make the RO retrievals less dependent on models, which would improve the retrievals itself and provide more independent information of such scenarios.

**Competing interests.** The authors declare that they have no conflict of interest.

**Acknowledgements.** Ramon Padulles and K. N. Wang's research was supported by an appointment to the NASA Postdoctoral Program at the Jet Propulsion Laboratory, administered by Universities Space Research Association under contract with NASA. The work conducted at ICE-CSIC/IEEC was supported by the Spanish grant ESP2015-70014-C2-2-R. Part of Cardellach's contribution has been supported by the Radio Occultation Meteorology Satellite Application Facility (ROM SAF) which is a decentralised operational RO processing centre under EUMETSAT. The JPL co-authors acknowledge support from the NASA US Participating Investigator (USPI) program. TRMM and GPM data were obtained courtesy of the NASA Precipitation Processing System (PPS). Part of this work was carried out at the Jet Propulsion Laboratory, California Institute of Technology, under a contract with the National Aeronautics and Space Administration. ©2017-2018. All rights reserved.

## References

- Anthes, R. A., Bernhardt, P. A., Chen, Y., Cucurull, L., Dymond, K. F., Ector, D., Healy, S. B., Ho, S. P., Hunt, D. C., Kuo, Y. H., Liu, H., Manning, K., McCormick, C., Meehan, T. K., Randel, W. J., Rocken, C., Schreiner, W. S., Sokolovskiy, S. V., Syndergaard, S., Thompson, D. C., Trenberth, K. E., Wee, T. K., Yen, N. L., and Zeng, Z.: The COSMIC/Formosat-3 mission: Early results, *Bulletin of the American Meteorological Society*, 89, 313–333, <https://doi.org/10.1175/BAMS-89-3-313>, 2008.
- Ao, C. O., Meehan, T. K., Hajj, G. A., and Mannucci, A. J.: Lower troposphere refractivity bias in GPS occultation retrievals, *Journal of Geophysical Research*, 108, 1–16, <https://doi.org/10.1029/2002JD003216>, 2003.
- Arakawa, A.: The cumulus parameterization problem: Past, present, and future, *Journal of Climate*, 17, 2493–2525, [https://doi.org/10.1175/1520-0442\(2004\)017<2493:RATCPP>2.0.CO;2](https://doi.org/10.1175/1520-0442(2004)017<2493:RATCPP>2.0.CO;2), 2004.
- Beard, K. V. and Chuang, C.: A new model for the equilibrium shape of raindrops, *Journal of the Atmospheric sciences*, 44, 1509–1524, [https://doi.org/10.1175/1520-0469\(1987\)044<1509:ANMFTE>2.0.CO;2](https://doi.org/10.1175/1520-0469(1987)044<1509:ANMFTE>2.0.CO;2), 1987.
- Bringi, V. N. and Chandrasekar, V.: *Polarimetric doppler weather radar; principles and applications*, Cambridge University Press, 2001.
- Cardellach, E., Tomás, S., Oliveras, S., Padullés, R., Rius, A., de la Torre-Juárez, M., Turk, F. J., Ao, C. O., Kursinski, E. R., Schreiner, W. S., Ector, D., and Cucurull, L.: Sensitivity of PAZ LEO Polarimetric GNSS Radio-Occultation Experiment to Precipitation Events, *IEEE Transactions on Geoscience and Remote Sensing*, 53, 190–206, <https://doi.org/10.1109/TGRS.2014.2320309>, 2014.
- Cardellach, E., Padullés, R., Tomás, S., Turk, F. J., de la Torre-Juárez, M., and Ao, C. O.: Probability of intense precipitation from polarimetric GNSS radio occultation observations, *Quarterly Journal of the Royal Meteorological Society*, <https://doi.org/10.1002/qj.3161>, 2017.
- Cardinali, C. and Healy, S. B.: Impact of GPS radio occultation measurements in the ECMWF system using adjoint-based diagnostics, *Quarterly Journal of the Royal Meteorological Society*, 140, 2315–2320, <https://doi.org/10.1002/qj.2300>, 2014.
- Cucurull, L., Derber, J. C., Treadon, R., and Purser, R. J.: Assimilation of Global Positioning System Radio Occul-

- tation Observations into NCEP's Global Data Assimilation System, *Monthly Weather Review*, 135, 3174–3193, <https://doi.org/10.1175/MWR3461.1>, 2007.
- Dee, D. P., Uppala, S. M., Simmons, A. J., Berrisford, P., Poli, P., Kobayashi, S., Andrae, U., Balmaseda, M. A., Balsamo, G., Bauer, P., Bechtold, P., Beljaars, A. C. M., van de Berg, L., Bidlot, J., Bormann, N., Delsol, C., Dragani, R., Fuentes, M., Geer, A. J., Haimberger, L., Healy, S. B., Hersbach, H., Hólm, E. V., Isaksen, I., Kallberg, P. W., Köhler, M., Matricardi, M., McNally, A. P., Monge-Sanz, B. M., Morcrette, J. J., Park, B. K., Peubey, C., de Rosnay, P., Tavolato, C., Thépaut, J. N., and Vitart, F.: The ERA-Interim reanalysis: Configuration and performance of the data assimilation system, *Quarterly Journal of the Royal Meteorological Society*, 137, 553–597, <https://doi.org/10.1002/qj.828>, 2011.
- Fjeldbo, G., Kliore, A., and Eshleman, V. R.: The Neutral Atmosphere of Venus as Studied with the Mariner V Radio Occultation Experiments, *The Astronomical Journal*, 76, <https://doi.org/10.1086/111096>, 1971.
- Foelsche, U., Syndergaard, S., Fritzer, J., and Kirchengast, G.: Errors in GNSS radio occultation data: Relevance of the measurement geometry and obliquity of profiles, *Atmospheric Measurement Techniques*, 4, 189–199, <https://doi.org/10.5194/amt-4-189-2011>, 2011.
- Hajj, G. A., Kursinski, E. R., Romans, L. J., Bertiger, W. I., and Leroy, S. S.: A Technical Description of Atmospheric Sounding By Gps occultation, *Journal of Atmospheric and solar-terrestrial physics*, 64, 451–469, [https://doi.org/10.1016/S1364-6826\(01\)00114-6](https://doi.org/10.1016/S1364-6826(01)00114-6), 2002.
- Healy, S. B. and Eyre, J. R.: Retrieving temperature, water vapour and surface pressure information from refractive index profiles derived by radio occultation: A simulation study, *Quarterly Journal of the Royal Meteorological Society*, 126, 1661–1683, <https://doi.org/10.1002/qj.49712656606>, 2000.
- Healy, S. B., Jupp, A. M., and Marquardt, C.: Forecast impact experiment with GPS radio occultation measurements, *Geophysical Research Letters*, 32, L03 804, <https://doi.org/10.1029/2004GL020806>, 2005.
- Hersbach, H., Peubey, C., Simmons, A. J., Berrisford, P., Poli, P., and Dee, D.: ERA-20CM: A twentieth-century atmospheric model ensemble, *Quarterly Journal of the Royal Meteorological Society*, 141, 2350–2375, <https://doi.org/10.1002/qj.2528>, 2015.
- Holloway, C. E. and Neelin, J. D.: Moisture Vertical Structure, Column Water Vapor, and Tropical Deep Convection, *Journal of the Atmospheric Sciences*, 66, 1665–1683, <https://doi.org/10.1175/2008JAS2806.1>, <http://dx.doi.org/10.1175/2008JAS2806.1>, 2009.
- Hou, A. Y., Kakar, R. K., Neeck, S., Azarbarzin, A. A., Kummerow, C. D., Kojima, M., Oki, R., Nakamura, K., and Iguchi, T.: The global precipitation measurement mission, *Bulletin of the American Meteorological Society*, 95, 701–722, <https://doi.org/10.1175/BAMS-D-13-00164.1>, 2014.
- Huffman, G. J., Bolvin, D., Braithwaite, D., Hsu, K., Joyce, R., Kidd, C., Nelkin, E. J., Sorooshian, S., Tan, J., and Xie, P.: Algorithm Theoretical Basis Document (ATBD) of Integrated Multi-satellite Retrievals for GPM (IMERG), version 4.6, Tech. Rep. March, <ftp://arthurhou.pps.eosdis.nasa.gov/gpmdata/>, 2017.
- Jensen, A. S., Lohmann, M. S., Benzon, H. H., and Nielsen, A. S.: Full spectrum inversion of radio occultation signals, *Radio Science*, 38, 1–15, <https://doi.org/10.1029/2002RS002763>, 2003.
- Jones, R. C.: A new calculus for the treatment of optical systems, *J. Opt. Soc. Am.*, 31, 488–493, <https://doi.org/10.1364/JOSA.31.000488>, 1941.
- Kozu, T., Iguchi, T., Shimomai, T., and Kashiwagi, N.: Raindrop size distribution modeling from a statistical rain parameter relation and its application to the TRMM precipitation radar rain retrieval algorithm, *Journal of Applied Meteorology and Climatology*, 48, 716–724, <https://doi.org/10.1175/2008JAMC1998.1>, 2009.
- Kummerow, C. D., Simpson, J., Thiele, O., Barnes, W., Chang, A. T. C., Stocker, E., Adler, R. F., Hou, A., Kakar, R., Wentz, F., Ashcroft, P., Kozu, T., Hong, Y., Okamoto, K., Iguchi, T., Kuroiwa, H., Im, E., Haddad, Z., Huffman, G., Ferrier, B., Olson, W. S., Zipser, E. J., Smith, E. A., Wilhelm, T. T., North, G., Krishnamurti, T., and Nakamura, K.: The Status of the Tropical Rainfall Measuring Mission (TRMM) after Two Years in Orbit, *Journal of Applied Meteorology*, 39, 1965–1982, [https://doi.org/10.1175/1520-0450\(2001\)040<1965:TSOTTR>2.0.CO;2](https://doi.org/10.1175/1520-0450(2001)040<1965:TSOTTR>2.0.CO;2), [http://journals.ametsoc.org/doi/abs/10.1175/1520-0450\(2001\)040<1965:TSOTTR>2.0.CO;2](http://journals.ametsoc.org/doi/abs/10.1175/1520-0450(2001)040<1965:TSOTTR>2.0.CO;2), 2000.
- Kursinski, E. R., Hajj, G. A., Schofield, J. T., Linfield, R. P., and Hardy, K. R.: Observing Earth's atmosphere with radio occultation measurements using the Global Positioning System, *Journal of Geophysical Research*, 102, 23 429–23 465, <https://doi.org/10.1029/97JD01569>, 1997.
- Liebe, H. J., Hufford, G. A., and Manabe, T.: A model for the complex permittivity of water at frequencies below 1 THz, *International Journal of Infrared and Millimeter Waves*, 12, 659–675, <https://doi.org/10.1007/BF01008897>, 1991.
- Lin, L., Zou, X., Anthes, R. A., and Kuo, Y. H.: COSMIC GPS Radio Occultation Temperature Profiles in Clouds, *Monthly Weather Review*, 138, 1104–1118, <https://doi.org/10.1175/2009MWR2986.1>, 2010.
- Liu, C. and Zipser, E. J.: The global distribution of largest, deepest, and most intense precipitation systems, *Geophysical Research Letters*, 42, 3591–3595, <https://doi.org/10.1002/2015GL063776>, 2015.
- Mishchenko, M. I., Travis, L. D., and Mackowski, D. W.: T-matrix computations of light scattering by nonspherical particles: A review, *Journal of Quantitative Spectroscopy and Radiative Transfer*, 55, 535–575, <http://www.sciencedirect.com/science/article/pii/0022407396000027>, 1996.
- NOAA/NCEP, C. E. M.: The GFS Atmospheric Model, NOAA/NCEP/Environmental Modeling Center Office Note, 442, 14, 2003.
- Oguchi, T.: Electromagnetic wave propagation and scattering in rain and other hydrometeors, *Proceedings of the IEEE*, 71, 1029–1078, <https://doi.org/10.1109/PROC.1983.12724>, 1983.
- Padullés, R., Cardellach, E., de la Torre-Juárez, M., Tomás, S., Turk, F. J., Oliveras, S., Ao, C. O., and Rius, A.: Atmospheric polarimetric effects on GNSS Radio Occultations: the ROHP-PAZ field campaign, *Atmospheric Chemistry and Physics*, 2, 635–649, <https://doi.org/10.5194/acp-16-635-2016>, 2016.

- Pruppacher, H. R. and Beard, K. V.: A wind tunnel investigation of the internal circulation and shape of water drops falling at terminal velocity in air, *Quarterly Journal of the Royal Meteorological Society*, 96, 247–256, <https://doi.org/10.1002/qj.49709640807>, 1970.
- Sokolovskiy, S. V.: Effect of superrefraction on inversions of radio occultation signals in the lower troposphere, *Radio Science*, 38, 1–14, <https://doi.org/10.1029/2002RS002728>, 2003.
- Sokolovskiy, S. V., Rocken, C., Schreiner, W. S., and Hunt, D. C.: On the uncertainty of radio occultation inversions in the lower troposphere, *Journal of Geophysical Research Atmospheres*, 115, 1–19, <https://doi.org/10.1029/2010JD014058>, 2010.
- Thayer, G. D.: An improved equation for the radio refractive index of air, *Radio Science*, 9, 803–807, <https://doi.org/10.1029/RS009i010p00803>, 1974.
- Vergados, P., Mannucci, A. J., Ao, C. O., Jiang, J. H., and Su, H.: On the comparisons of tropical relative humidity in the lower and middle troposphere among COSMIC radio occultations and MERRA and ECMWF data sets, *Atmospheric Measurement Techniques*, 8, 1789–1797, <https://doi.org/10.5194/amt-8-1789-2015>, <http://www.atmos-meas-tech.net/8/1789/2015/>, 2015.
- Vorob'ev, V. V. and Krasil'nikova, T. G.: Estimation of the accuracy of the atmospheric refractive index recovery from Doppler shift measurements at frequencies used in the NAVSTAR system, *Physics of Atmosphere and Ocean*, 23, 602–609, 1994.
- Wang, K.-N., de la Torre Juarez, M., Ao, C. O., and Xie, F.: Correcting negatively-biased refractivity below ducts in GNSS radio occultation: An optimal estimation approach towards improving planetary boundary layer (PBL) characterization, *Atmospheric Measurement Techniques*, <https://doi.org/10.5194/amt-2017-105>, 2017.
- Xie, F., Syndergaard, S., Kursinski, E. R., and Herman, B. M.: An approach for retrieving marine boundary layer refractivity from GPS occultation data in the presence of superrefraction, *Journal of Atmospheric and Oceanic Technology*, 23, 1629–1644, <https://doi.org/10.1175/JTECH1996.1>, 2006.
- Xie, F., Wu, D. L., Ao, C. O., Mannucci, A. J., and Kursinski, E. R.: Advances and limitations of atmospheric boundary layer observations with GPS occultation over southeast Pacific Ocean, *Atmospheric Chemistry and Physics*, 12, 903–918, <https://doi.org/10.5194/acp-12-903-2012>, 2012.
- Yang, S. and Zou, X.: Assessments of cloud liquid water contributions to GPS radio occultation refractivity using measurements from COSMIC and CloudSat, *Journal of Geophysical Research: Atmospheres*, 117, 1–11, <https://doi.org/10.1029/2011JD016452>, 2012.
- Yang, S. and Zou, X.: Dependence of positive refractivity bias of GPS RO cloudy profiles on cloud fraction along GPS RO limb tracks, *GPS Solutions*, <https://doi.org/10.1007/s10291-016-0541-1>, 2016.
- Zou, X., Yang, S., and Ray, P. S.: Impacts of Ice Clouds on GPS RO Measurements, *Journal of the Atmospheric Sciences*, 69, 3670–3682, <https://doi.org/10.1175/JAS-D-11-0199.1>, 2012.
